# Supplementary material for: How awareness and confidence affect flood-risk precautionary behavior of Greek citizens: the role of perceptual and emotional mechanisms
Source: Copernicus journal article supplement (doi:10.5194/nhess-2018-307), 2018-11-27
Supplement: Supplementary file [file nhess-2018-307-RC1-supplement.pdf]

# 1 How awareness and confidence affect flood-risk precautionary 2 behavior of Greek citizens: the role of perceptual and emotional 3 mechanisms

4 Katerina Papagiannaki<sup>1</sup>, Vassiliki Kotroni<sup>1</sup>, Kostas Lagouvardos<sup>1</sup>, and Giorgos Papagiannakis<sup>2</sup>

5 <sup>1</sup>Institute for Environmental Research and Sustainable Development, National Observatory of Athens, Athens, Greece

6 <sup>2</sup>Athens University of Economics and Business, Athens, Greece

7 *Correspondence to:* Katerina Papagiannaki (katpap@noa.gr)

8 **Abstract.** This study examines the mechanisms of flood-risk precautionary behavior among Greek citizens. To that end, it  
9 specifies a comprehensive model in which risk perception and worry mediate the effects of awareness-raising factors and  
10 confidence attitudes on individuals' flood preparedness. Both the current preparedness and preparedness intention are  
11 assessed. Raw data were obtained via an online survey that received 1,855 responses. Findings from SEM (structural  
12 equation modeling) analysis indicate that worry mediates the effects of awareness and confidence on preparedness; risk  
13 perception is limited to the activation of preparedness intention. The results also suggest that past risk perceptions might  
14 have affected prior preparedness motivations associated with current preparedness. Interestingly, citizens who had already  
15 undertaken preparedness measures in the past appear to be more willing to invest in new measures. Implications for  
16 improving flood risk management are discussed.

17 *Keywords:* flood preparedness, risk perception, worry, mediation, flood risk management, Greece

## 18 1 Introduction

19 Floods are among the most costly and life-threatening weather-related hazards, causing serious concerns among societies  
20 worldwide (Barredo, 2007). Moreover, the observed increase in European flood losses is largely due to the growing exposure  
21 caused by increasing flood-prone assets (Barredo, 2009). Emphasis is therefore given to the need to address societal causes  
22 of the increasing flood risk (Treby et al., 2006). During the last two decades, flood-risk management has undergone a  
23 gradual shift, moving from the investment in costly structural measures to non-structural policies that promote the  
24 enhancement of communities' resilience to floods (Nye et al., 2011; Cardona et al., 2012; Rambonilaza et al., 2016). In this  
25 effort, public authorities and citizens share the responsibility for the consequences of flooding (Lave and Lave, 1991; Fatti  
26 and Patel, 2013). Given a basic level of protection by the managing authorities, individuals' decisions may affect their  
27 exposure to flood risk and effectively contribute to the reduction of material losses (Kron, 2005).

28 Individual precautionary behavior is a crucial element of a community's preparedness against flood risk. As reported by  
29 the United Nations International Strategy for Disaster Reduction (UN/ISDR, 2009), individual preparedness contributes to  
30 the effective anticipation, response and recovery from the effects of potential disasters. Therefore, a better understanding of  
31 the determinants of individual preparedness can help policy makers to improve communication and flood-risk management.  
32 Current empirical literature has shown that personal negative flood experience, trust in authorities, and risk communication  
33 locally are among the main factors that influence the level of preparedness (Bubeck et al., 2012; Kellens, et al., 2013; O'Neill  
34 et al., 2016). The role of demographic variables has also been investigated, although the results are particularly contradictory  
35 on the extent to which such factors have a significant impact on precautionary behavior (Wachinger et al., 2013).

36 The various predictors of individuals' preparedness can be grouped into two meaningful categories. The first category  
37 includes factors that may influence the level of citizens' awareness of flood-related issues; the second category includes  
38 factors that highlight one's confidence in the existing coping capacities. In addition to the aforementioned variables,

1 behavioral studies suggest that perceptual and emotional factors may also influence individual decision-making and attitude  
2 change. The perception of risk is shaped by the conceptual understanding of the expected threat (Glatron and Beck, 2008).  
3 According to protection motivation theory (PMT) introduced by Rogers (1975; 1983) in the field of psychology, if the  
4 individual does not appraise an event as severe or likely to occur, no protection motivation, and thus no behavioral change, is  
5 expected. Risk perception, therefore, is a potential driver of precautionary behavior (Bradford et al., 2012; Haer et al., 2016).  
6 In addition, prior empirical work shows that emotions, such as worry and fear of floods, are likely to trigger precautionary  
7 behavior (Miceli et al., 2008; Raaijmakers et al., 2008; Bradford et al., 2012). However, the extant literature has not yet  
8 addressed simultaneously the effects of the different awareness and confidence variables on flood-risk precautionary  
9 behavior through perceptual and emotional mechanisms. Thus, significant unmodeled relationships may have been omitted,  
10 which may result in either a partial understanding of the entire process or even misleading statistical findings.

11 Drawing on the above, the present study adopts an integrated approach to examine the perceptual and emotional  
12 mechanisms through which awareness-raising and confidence-related variables affect flood-risk precautionary behavior in  
13 the social context of Greece. To ensure a complete picture of precautionary behavior, both the current flood preparedness  
14 and preparedness intention are examined (Bubeck et al., 2012). To collect relevant data, we utilized an original internet-  
15 based survey targeting Greek citizens. The questionnaire was launched by the most trusted Greek meteorological site, which  
16 is also among the five most visited Greek websites of general interest. A significant number of valid responses (1,855) was  
17 received. Structural equation modeling is applied to examine the derived hypotheses.

18 The present study contributes to the literature in several ways. First, it informs current literature on the role of perceptual  
19 and emotional factors in explaining how awareness and confidence affect individual precautionary behavior. Second, the  
20 structure of the proposed model provides a distinctive analysis of the paths leading to the current preparedness and the  
21 preparedness intention. In this context, empirical evidence of the relationship between current preparedness and preparedness  
22 intention is provided. Finally, the study discusses practical implications for improving flood risk management in an area that  
23 has been poorly addressed.

## 24 Model specification and hypotheses

25 The conceptual  framework of the present  model has been built upon existing theories of individual attitude change, such as  
26 the initial PMT and its revised version (Rogers, 1975;  1983). **The PMT introduced a model in which cognitive mediating  
27 processes facilitate fear-appeal components to stimulate behavioral change.** The focus is on the cognitive appraisal of the risk  
28 rather than emotions; protection motivation is exclusively due to cognitive processes. The **present** research model extends  
29 alternative aspects of the mechanisms of self-protection behavior. It examines whether mechanisms that encompass both  
30 cognitive and emotional processes facilitate or discourage a person's precautionary behavior depending on the level of  
31 awareness and the confidence attitude this person has. The research model is illustrated in Figure 1 and consists of the sets of  
32 predictor (X), mediating (M), and outcome (Y) variables. Control (C) variables are also included to take into account  
33 **demographic parameters associated with behavioral responses to the anticipa**  **risk.**

### 34 **2.1 Outcomes**

35 The outcome **variables** reflect the flood-risk precautionary behaviors, namely, current preparedness (Y1) and preparedness  
36 intention (Y2).  **Current preparedness** reflects the extent to which people have taken precautionary measures (Miceli et al.,  
37 2008), while the preparedness intention measures the willingness of people to make private expenses to protect themselves  
38 against future floods. Hence, preparedness intention shows not only the general intention of the individual to change  
39 precautionary behavior but also the extent to which the individual is willing to realize the self-reported intention (Terpstra,  
40 2011).

## 1 2.2 Predictors

### 2 2.2.1 Experience severity (X1)

3 Flood experience has been related to precautionary behavior (Whitmarsh, 2008; Bradford et al., 2012). **Analysis of the**  
4 **feelings emerging from flood experience show that**  negative emotions may be a key factor in explaining decision-making  
5 and higher degrees of preparedness (Keller et al., 2006). The experience of low severity events may even have a negative  
6 effect on precautionary behavior, due to overestimation of individual coping capacity (Wachinger et al., 2013). The present  
7 model includes an indicator of the flood damage severity suffered by the citizens, which is considered to be a powerful  
8 awareness-raising factor due to its experiential nature.

### 9 2.2.2 Vulnerability awareness (X2)

10 **Vulnerability to floods has been treated either as an objective predictive parameter relevant to the hazard proximity or as the**  
11 **result of flood experience** (O'Neill et al., 2016). In the present study, to better simulate the actual awareness of personal  
12 vulnerability to flood hazard, a combination of exposure aspects of vulnerability is applied (Terti et al., 2015).

### 13 2.2.3 Risk communication (X3)

14 Risk communication may motivate people to prevent damage (Grothmann and Reusswig, 2006). In the present  study, the  
15 level of **knowledge on the existing threats due to the information disseminated from local authorities is assessed.**

### 16 2.2.4 Trust in authorities (X4)

17 Feelings of trust in authorities have been found to discourage precautionary behavior (Terpstra, 2011) and to promote  
18 passive behavior (Poussin et al., 2014). Wachinger et al. (2013) argued that the lack of trust is likely to activate people who  
19 believe there is no other choice. **Drawing on the above, the present model considers both trust and lack of trust in local**  
20 **authorities, combined in one indicator of the citizen's trust in authorities** 

### 21 2.2.5 Self-confidence (X5)

22 Indicators of coping appraisal or self-efficacy have been used as predictors of preparedness intention; however, the results  
23 are contradictory, particularly with respect to the effect of resource-related attributes (Reusswig, 2006; Bubeck et al., 2012;  
24 Grothmann and Terpstra and Lindell, 2013). **The present model introduces an indicator of the respondent's self-reported**  
25 **awareness of local hazards and protection measures** 

## 26 2.3 Mediators

### 27 2.3.1 Risk perception (M1)

28 **According to the 'motivational hypothesis' (Weinstein et al., 1998), perception of high personal risk is assumed to motivate**  
29 **people to adopt precautionary behavior. Risk perception has been associated with precautionary behavior to cope with flood**  
30 **risk (Grothmann and Reusswig, 2006; Botzen et al., 2009). Bradford et al. (2012) suggested that increasing risk perception**  
31 **on its own would not necessarily result in increased preparedness. For example, flood risk may be differently perceived as a**  
32 **result of the level of human exposure to floods (Kellens et al., 2013). Kreibich and Thielen (2008) found a positive**  
33 **correlation between risk perception and the adoption of precautionary measures among people who were affected by a recent**  
34 **flood event in their area. In addition, the level of information obtained may influence risk perception, especially when there**  
35 **is a lack of personal flood experience (Wachinger et al., 2013). A person without flood experience may underestimate danger**  
36 **(Ruin et al., 2007). Additionally, feelings of security may be associated with reduced risk perception (Wachinger et al., 2013;**  
37 **Poussin et al., 2014). Thus, the following hypotheses are developed:**

- 1 Hypothesis 1. Risk perception (M1) mediates the effects of the predictor variables on current preparedness (Y1).
- 2 Hypothesis 2. Risk perception (M1) mediates the effects of the predictor variables on preparedness intention (Y2).

### 3 2.3.2 Worry (N

4 With respect to the emotions, recent studies have shown that worry and fear of floods may affect individual preparedness  
5 behavior (Miceli et al., 2008; Zaleskiewicz et al., 2002). In addition, both the prior experience of flooding and the distance to  
6 the perceived flood zone have been associated with negative emotions (O'Neill et al., 2016). We therefore developed the  
7 following hypotheses:

- 8 Hypothesis 3. Worry (M2) mediates the effects of the predictor variables on current preparedness (Y1).
- 9 Hypothesis 4. Worry (M2) mediates the effects of the predictor variables on preparedness intention (Y2).

## 10 2.4 Current preparedness and preparedness intention

11 The existing literature has pointed out the need to examine whether the existing individual flood preparedness at the time of  
12 the behavioral survey relates to the intention of the individual to take precautions (Bubeck et al., 2012, Poussin et al., 2014).  
13 To our knowledge, however, no concrete empirical evidence exists regarding the direction and significance of this  
14 relationship. While it seems likely that the existence of protective measures will make further precautionary behavior less  
15 necessary, it is equally likely that the proven effectiveness of measures already in place will enhance precautionary behavior.  
16 Thus, we cannot a priori specify the relationship between Y1 and Y2 in our model. Instead, we expect that there is a  
17 significant relationship and, thus, the following hypothesis is tested:

- 18 Hypothesis 5. Current preparedness (Y1) is associated with preparedness intention (Y2).

## 19 2.5 Controls

20 The preparedness model  includes control variables to account for the demographic attributes that previous research has  
21 identified as potential antecedents of individual precautionary behavior. However, literature has not reached to a consensus  
22 on the effects of demographics (for a thorough review see Kellens et al., 2011), which are occasionally found to have only a  
23 marginal effect on preparedness (Terpstra and Lindell, 2013; Wachinger et al., 2013). The majority of homeowners were  
24 found to be more worried and better prepared; employment and income were associated with preparedness intention; and  
25 people that live in a less urbanized area appeared to perceive higher flood risk (Scolobig et al., 2012).

## 26 3 Method

### 27 3.1 Data collection

28 Greek citizens were approached via an online questionnaire launched by the www.meteo.gr website, which provides  
29 weather, wave, lightning, and dust forecasts produced by the weather forecasting group at the Institute for Environmental  
30 Research, National Observatory of Athens (IERSD/NOA) (Lagouvardos et al., 2003; Lagouvardos et al., 2017). This website  
31 is the most trusted Greek meteorological website and among the five most visited websites of general interest in Greece. The  
32 average number of daily unique visitors of the website exceeds 350,000. Surveys related to weather hazards are  
33 systematically posted with a very strong public response. The research findings of these surveys are then posted on the  
34 website to raise public awareness and to promote the benefits of taking part in surveys.

35 Our questionnaire was posted on 23 October 2016 and received 1,855 valid responses within a 5-day period. It contained  
36 41 questions and aimed to examine preparedness in the country through the perspective of citizens and investigate drivers of  
37 preparedness before a flood hazard or following a flood disaster. It was structured in the following order  Section A. Flood  
38 experience; Section B. Perceived risk and concern about predefined flood-related hazards and feelings of worry; Section C.

1 Precautionary measures taken and intention to invest in such measures; Section D. Means of risk communication,  
2 information sources, confidence attitudes, and perceived causes of flood occurrence; and Section E. Settlement type,  
3 exposure attributes, and demographics. The full questionnaire is available upon request.

### 4 3.2 Sample profile

5 Table 1 provides the demographic characteristics of the respondents. Sixty eight percent of the respondents were males.  
6 Their ages ranged from 15 to 86 years. Compared to the last national census in 2011, the middle age category (31-60 years  
7 old) is overrepresented in the sample (74% compared to the 43% in the census), while older people (61-86 years old) are  
8 underrepresented (6% compared to the 23% in the census). These percentages probably reflect the low use of internet by  
9 older people. Since prior studies largely question the effect of age and gender on precautionary behavior, the difference from  
10 the census data does not raise concerns about the reliability of the model (Wachinger et al., 2013). In contrast, rates of home  
11 ownership (79%) and unemployment (14%), which are parameters that have been associated with precautionary behavior  
12 (Burningham et al., 2008), are representative of the census data. Twenty percent (n=370) of the survey population had been  
13 affected by floods. The majority of the affected respondents (67%) lived in urban areas of the country.

14 Figure 2 contains information on the spatial and temporal distribution of the flood events recorded in the survey. Figure  
15 2a shows the flood distribution of the questionnaire in the 51 prefectures of Greece in relation to the distribution of the total  
16 damaging floods recorded in the high-impact weather event database (HIWE) developed by the Institute for Environmental  
17 Research and Sustainable Development of the National Observatory of Athens - IERSD/NOA (Papagiannaki et al., 2013).  
18 The HIWE database is available online and is constantly updated to include the latest events (NOA, 2018). Both distributions  
19 correspond to the period of 2000-2016, for which HIWE provides a complete flood inventory. The largest proportion of  
20 floods in both distributions is attributed to the prefecture of Attica, which is the most densely populated and urbanized area  
21 in the country. Moreover, a statistically significant and positive correlation was estimated for the two distributions  
22 (Spearman's  $\rho=0.50$ ,  $p<.001$ ). The estimated correlation shows a good representation of the country flood profile, thus  
23 enhancing the validity of the questionnaire responses and the reliability of the model analysis. Figure 2b shows the annual  
24 distribution of the survey flood record. One quarter of the experiences were related to floods that occurred during the most  
25 recent year (2016); however, the events reported cover a long period of time, which shows that the interest of the survey  
26 participants was not only driven by a very recent flood experience.

27 To assess the objectivity of the respondents about flood experience severity, the reported flood events were identified and  
28 evaluated based on the HIWE database. Each recorded flood was then attributed to the maximum 24 h rainfall observed in  
29 the corresponding municipality where the flood event occurred. This was feasible for 281 (76%) out of the 370 reported  
30 flood events. The correlation between the 24 h rain and the flood severity was positive and statistically significant  
31 (Spearman's  $\rho=0.21$ ,  $p<.001$ ). This indicates that people more adversely affected by floods in their residential area were  
32 more likely to report a stronger flood impact. Thus, there is consistency between the rainfall hazard and the reported impact  
33 severity.

### 34 3.3 Measurement

35 A detailed description of all variables used in the empirical analysis, including the associated items we used to construct  
36 them, is available in Table A1 of the Appendix A.

#### 37 3.3.1 Outcomes

38 Various indicators have been used in recent literature to measure individual preparedness across different regions, namely,  
39 the extent to which households implement flood damage mitigation measures (Bradford et al., 2012; O'Sullivan et al., 2012;  
40 Poussin et al., 2014; O'Neill et al., 2016) or intend to prepare (Brilly and Polic, 2005; Terpstra, 2011; Bubeck et al., 2012). In

1 the present study, the current preparedness was measured as the sum of the items related to various preventive measures,  
2 weighted for their significance in relation to the relative personal time and the cost required for their implementation.  
3 Preparedness intention was measured by a question concerning the intention of the respondent to invest in precautionary  
4 measures.

### 5 3.3.2 Predictors

6 Experience severity was measured by a question about the severity of the damage suffered by the respondent from flooding.  
7 Vulnerability awareness results from the synthesis of two elements related to a) the level of perceived exposure and b) actual  
8 exposure, meaning the hazard proximity (the distance from the closest hazardous water source). The indicator of risk  
9 communication is a synthesis of six items about the means of risk communication used by local authorities to approach and  
10 inform the citizens. The risk communication means are weighted to take into account the extent to which communication is  
11 effectively performed. In particular, it was considered that seminars on local dangers requiring the physical presence of the  
12 citizen and visualization of risks with maps and special warning signs are more effective means of communication.  
13 Alternative weights were also tested on the basis of different estimates made by colleagues with relevant experience without  
14 affecting the results of the analysis.

15 Trust in authorities was measured by two questions that assess the individual's opinion about the adequacy of the  
16 preventive measures taken by local authorities and about the authorities' inability to cope with floods in the past. Self-  
17 confidence was measured as the average of two discrete questions about the respondent's perception of being aware of the  
18 local flood hazards and the existing protection measures.

### 19 3.3.3 Mediators

20 Risk perception has been defined as the subjective assessment of the likelihood of occurrence of a particular type of accident  
21 and of the severity of the potential consequences (Sjöberg et al., 2004). Miceli et al. (2008) suggested combining these two  
22 elements of risk perception into an overall, more comprehensive indicator. Following this concept, a single variable was  
23 included in the preparedness model. The reliability of the risk perception indicator is high (Cronbach's alpha=.88) according  
24 to recommended thresholds (Tavakol and Dennick, 2011). Worry was measured by a question about how concerned the  
25 respondent feels about a possible future flood event.

### 26 3.3.4 Controls.

27 The demographic variables under consideration are home ownership, gender, family size, employment status, age, and  
28 urbanization. To measure the degree of urbanization, the participants were asked to characterize their settlement based upon  
29 urbanization criteria (cottage area, village, small town or city).

## 30 3.4 Statistical methods

31 Path analysis, a structural equation modeling (SEM) methodology (Hayes, 2013), was applied to test the preparedness model  
32 hypotheses. The use of SEM allows for a simultaneous evaluation of the relationships in a hypothesized mediation process,  
33 the direct effect of the predictor variable on the outcome, and the indirect (mediating) effect explaining how an exogenous  
34 variable affects the outcome variable through the mediator (Iacobucci, 2010). SEM produces parameters that indicate the  
35 nature and size of the relationship between the model variables, and information about the overall fit of the model. To  
36 address possible interdependence that could bias the path analysis results, the specification model assumes covariance  
37 between the two outcome variables (Y1 and Y2). The Stata statistical software was used for all data analysis.

38 Note that the main specification does not include the age variable due to many missing values (34% of the population  
39 sample). The rest of the variables had a very low number of missing values, up to 3% of the population sample. In



1 unreported analysis, we included age as control variable (n=1,227); age had only a marginal positive effect on current  
2 preparedness, while the effect on preparedness intention was statistically insignificant. The results remained qualitatively the  
3 same.

4 Table 2 presents descriptive statistics and correlations between the variables. We employed the non-parametric  
5 Spearman's rank correlation method, which does not assume normality of data and is appropriate for correlating both  
6 continuous and discrete variables (McDonald, 2014; Shipley, 2016). None of the correlations is high enough (Spearman's  
7  $\rho < 0.40$ ) to raise any concerns for the subsequent analysis (Gujarati, 2004).

## 8 **4 Results**

9 Table 3 includes the path analysis results. To assess the model validity, we report multiple fit indices (Marsh et al., 2004;  
10 Iacobucci, 2010). The comparative fit index (CFI) was above the threshold of 0.9 and both the standardized root mean square  
11 residual (SRMR) and the root mean square error of approximation (RMSEA) fit indices were below the threshold of 0.10.  
12 These results indicate a very good fit of the data (Hu and Bentler, 1999; Iacobucci, 2010).

13 To facilitate interpretation of the path analysis results, Figure 3 shows the direct and indirect effects (standardized  
14 coefficients) of the predictor variables on the current preparedness (Fig. 3a) and the preparedness intention (Fig. 3b). The  
15 overall indirect effect is divided into the mediated effects attributed to risk perception and worry. The sum of the direct and  
16 the indirect effect equals the total effect of the predictor on the outcome variable. The results suggest that risk perception  
17 does not mediate the effects of the awareness-raising and confidence variables on current preparedness. Hypothesis 1  
18 therefore is not confirmed. Risk perception mediates the effects of three predictor variables, namely, experience severity,  
19 vulnerability awareness and trust in authorities, on preparedness intention. Hypothesis 2 therefore is partly confirmed.

20 With regard to the role of emotion, the results indicate that worry mediates the effects of experience severity on both the  
21 current preparedness and preparedness intention. Worry was also found to fully mediate (i.e., no direct effect of the predictor  
22 on the outcome was found) the effect of vulnerability awareness on current preparedness and the largest part of the mediated  
23 effect on preparedness intention (as indicated previously vulnerability awareness is also mediated by risk perception). The  
24 effect of risk communication on preparedness intention was fully mediated by the feelings of worry. In contrast, risk  
25 communication appeared to have only a direct effect on current preparedness without the interference of emotional process.  
26 As expected, worry was found to mediate the effect that trust in authorities has on precautionary behavior. The effect was  
27 negative on both the current preparedness and preparedness intention. Moreover, the effect of trust in authorities on  
28 preparedness intention was fully mediated by the emotional process. Finally, worry was not found to mediate any of the  
29 effects of self-confidence on the preparedness variables. The above findings provide partly support to Hypotheses 3 and 4.

30 Path analysis detected a positive covariance between current preparedness (Y1) and preparedness intention (Y2) (Table  
31 3). Moreover, the Spearman's rank correlation analysis showed a positive and significant correlation between Y1 and Y2  
32 (Table 2). Further correlation analyses also indicated the strong relationship between Y1 and Y2 among citizens with prior  
33 flood experience. Specifically, the Spearman's  $\rho$  between Y1 and Y2 was 0.40 ( $p < .001$ ) for the population sample with  
34 flood experience and 0.44 ( $p < .001$ ) if the experience severity was over 3 (in a scale from 0 to 5). To examine Hypothesis 5,  
35 according to which Y1 relates to Y2, we assessed the correlations between Y2 and each of the items that consist Y1 (Table  
36 A1, Y1i items). The Spearman's  $\rho$  varied from 0.11 to 0.27 ( $p < .001$ ) if the precautionary measure referred to investing  
37 money for simple flood-defense measures, for insurance, or for structural changes. The correlations were also positive when  
38 accounting for the application of non-costly measures (from 0.13 to 0.23,  $p < .001$ ). In contrast, the correlations between Y2  
39 and the 'no adaptation' items (Table A1, items Y11,2) were negative (from -0.14 to -0.21,  $p < .001$ ). Based on the above  
40 findings, Hypothesis 5 is confirmed.

1 Overall, the control variables performed as expected. They were found to be related to preparedness, as presumed, except  
2 for gender. Home ownership had the largest effect, particularly on the current preparedness, which indicates that people  
3 owning a home are more likely to be already prepared to a certain extent. Family size and employment were also associated  
4 with increased preparedness. Higher urbanization, on the other hand, was related to reduced preparedness, in line with the  
5 results of Scolobig et al. (2012).

## 6 **5 Discussion**

### 7 **5.1 Theoretical implications**

8 The aim of this study was to advance understanding of the mechanisms that link awareness-raising and confidence-related  
9 variables with current flood preparedness and with preparedness intention. Hence, the findings may help researchers to build  
10 more comprehensive models that would better predict flood-risk precautionary behavior.

11 Overall, the results demonstrate that risk perception and worry are significant mechanisms of precautionary behavior.  
12 Both perceptual and emotional processes appear to trigger preparedness intention in the presence of an environment that  
13 increases citizens' awareness of flood-related issues and decreases confidence on the authorities' coping capacities to protect  
14 them against floods (Wachinger et al., 2013). The severity of a prior flood experience and how it relates to precautionary  
15 behavior is also associated with the stimulation of flood risk perception and feelings of worry. With regard to worry, the  
16 finding is in line with Siegrist and Gutscher (2008), who suggested that flood victims might have taken more precautionary  
17 measures than citizens without flood experience, due to negative emotions.

18 The only variable not filtered by either risk perception or emotion is self-confidence, which appears to have only direct  
19 effects on precautionary behavior. The more confident a person feels about knowing the local flood hazards and the available  
20 protective measures, the higher the level of current preparedness and the intention to adopt precautionary behavior. In  
21 contrast, higher trust in authorities is shown to relate to decreased worry, in line with Terpstra's findings (2011), as well as to  
22 decreased flood risk perception. Trust brings security feelings and thus may be an important cause of the reluctance of  
23 citizens to take precautionary measures (Poussin et al., 2014).

24 The emotional mediating process is stronger when compared to the perceptual one. The majority of the preparedness  
25 predictors are stimulated by the feelings of worry for a flood event. Risk perception at the time of the survey is associated  
26 only with preparedness intention. Thus, risk perception does not answer why awareness and confidence have triggered the  
27 existing level of preparedness. However, it is likely that past risk perceptions might have affected prior preparedness  
28 motivations, associated with what we call 'current preparedness'. Prior experiences and a broad framework of past  
29 references might have influenced the perception of risk over time. A possible time-dependent relationship between risk  
30 perception and precautionary behavior could partly be the answer to the concerns raised about the paradox that high risk  
31 perception does not necessarily lead to higher preparedness or that it may even lead to lower preparedness (Siegrist and  
32 Gutscher, 2008; Wachinger et al., 2013). A longitudinal study could therefore provide more evidence on the impact of risk  
33 perception on individual precautionary behavior.

34 An interesting finding of the study is the positive correlation of current preparedness and preparedness intention that may  
35 seem paradoxical at first glance. Why do citizens that are currently more prepared appear to be more willing to invest in  
36 future precautionary measures? On the basis of further analyses discussed in the previous section, we argue that people may  
37 acknowledge the benefits of precautionary measures previously implemented. Furthermore, citizens who are already well  
38 informed and familiar with implementing measures probably feel more willing to repeat this behavior. We should also take  
39 into account that flood precaution is not a one-off action. Precautionary measures may need refreshment over time. The  
40 correlation results also indicate that people evaluate the final benefit independent of the resources needed for a protection  
41 measure. According to the review of behavioral theories on disaster and emergency health preparedness by Ejeta, Ardalan



1 and Paton (2015), there is evidence that resource-related attributes are even negatively associated with preparedness  
2 intentions.

3 We also acknowledge that there may be uncertainty regarding the actual behavior that will follow one's intention to  
4 adopt precautionary behavior (Schifter and Ajzen, 1985). That is, people may declare willingness simply because they know  
5 that is the right thing to do. However, the online survey has the advantage that it protects respondent anonymity, while it  
6 removes the presence of the judge-researcher. Hence, it allows for objective rather than 'satisfactory' answers and reduces  
7 potential social desirability bias (Podsakoff et al., 2003). Nevertheless, the concluding remark is that the relationship  
8 between the two preparedness variables is not straightforward. Variables that could intervene in this relationship might be  
9 the self-estimated effectiveness of the previously applied measures, the usefulness of each of these measures based on  
10 previous flood experience, and the assessment of the cost-saving the individual achieved. In addition, further questions to  
11 evaluate the 'actual' intention of the respondent could be included in a future survey.

12 We should note that results about the mediating emotional and perceptual processes that lead to preparedness cannot  
13 easily be compared to previous findings, as the recent literature has focused on the direct relationships between the factors  
14 relating to individual precautionary behaviors. However, our empirical findings support the theoretical argumentation about  
15 the regulating role of emotions in the relationship between the individual and the environment (Miceli et al., 2008). The role  
16 of emotion has been treated with caution in the PMT. Rogers (1975) supported that the cognitive processes may better  
17 explain the effects of fear-appeal components on attitude change. Our findings show that risk perception, as a cognitive  
18 process, may indeed stimulate the intention of the individual to adopt flood precautionary behavior.

19 **5.2 Practical implications**

20 Results show a poor performance of the current preparedness and a modest performance of the preparedness intention.  
21 Individual preparedness among the flood-affected respondents is higher, but again the average performance is marginally  
22 close to the average level, which is 5 for the current preparedness (max=12) and 2 for the preparedness intention (max=4).  
23 This indicates that there is significant potential for improvement of the overall preparedness of citizens, with support from  
24 the local authorities.

25 Moreover, the profile of the survey participants shows that Greek people tend to perceive low risk from flooding but not  
26 due to ignorance. In fact, the path analysis does not demonstrate an association between risk communication and risk  
27 perception. As Brown (2014) points out, risk perception draws on much more than facts alone. Indeed, the results show that  
28 risk perception is also associated with trust in authorities and vulnerability awareness.

29 Collective findings from the present study could inform policy makers on specific options that they could support to  
30 improve flood-risk management at the local level. These options are related both to raising public awareness and to  
31 establishing the right relationship between citizens and local authorities. As the results show, the effectiveness of these  
32 options will be significantly affected by the individual perception and emotions against flood risk. A successful campaign  
33 thus should involve the promotion of information that clearly shows the vulnerability of citizens on the basis of objective  
34 risks and past flood incidents. This strategy will lead to increased awareness and activation of citizens due to increased  
35 concern and flood risk perception.

36 Investment in the effective communication of local flood hazards and risks should be local authorities' priority. The  
37 analysis of the survey participants' profiles shows that Greek citizens are not effectively approached by flood-risk managers;  
38 the vast majority of citizens never received any information about local flood hazards from the local authorities. This  
39 indicates a noticeable gap in the risk communication process or a highly inefficient top-down risk management. Both cases  
40 may constitute significant weaknesses of Greek communities' resilience to floods. The high frequency of catastrophic flood  
41 events due to rainfall has already been demonstrated in a previous study targeting Greece (Papagiannaki et al., 2013). In  
42 addition, recent studies of the individual flood emergency responses in Attica found a low degree of individual response to

1 flood alerts, limited knowledge of flood risks and ineffectiveness of risk communication as well as low trust in authorities  
2 (Diakakis et al., 2017; Papagiannaki et al, 2017).

3 According to the survey results, people in more urbanized areas are manifesting higher trust in authorities and lower  
4 vulnerability awareness. Moreover, the urban environment is associated with reduced flood precautionary behavior. These  
5 findings indicate a high dependency of urban citizens on local authorities, which in turn may conceal complacency against  
6 flood risk. Therefore, policy makers should clearly reach the public audience with the message that building resilience  
7 against flood risk at the community level needs the involvement of the citizens.

## 8 **6 Conclusions**

9 This study examined the hypotheses that risk perception and worry mediate the effects of awareness-raising and confidence-  
10 related variables on individual precautionary behavior against flood risk. The methodological approach meant to integrate  
11 key-explanatory variables within a model that focused on important mechanisms of self-protective behavior. In this context,  
12 we further analyzed the association between the current flood preparedness and preparedness intention to provide an  
13 overview of behavior modifications.

14 According to the results, both risk perception and worry constitute mechanisms of the individual's flood-risk  
15 precautionary behavior. Worry was demonstrated to stimulate both the current preparedness and preparedness intention. On  
16 the other hand, risk perception was only found to lead to preparedness intention. Interestingly, current preparedness and  
17 preparedness intention were found to have a positive relationship. Citizens who have undertaken preparedness measures in  
18 the past appear to be more willing to invest in new measures, probably motivated by the benefits they gained from the efforts  
19 to protect themselves in the past.

20 The present study extends current knowledge of the drivers of citizens' flood precautionary behavior. The research  
21 findings could help researchers to build more comprehensive models of flood-risk precautionary behavior; they could also  
22 become useful material for the local authorities. Flood-risk managers could identify possible gaps in risk communication,  
23 advance their understanding of citizens' precautionary behaviors, and adjust their strategies to improve flood resilience.

24

25 **Acknowledgement.** This research has been financed by the "Development Proposals of Research Entities – KRIPIS II"  
26 framework, which is funded by N.P. "Competitiveness and Entrepreneurship 2014–2020", Action: "THESPIA II–  
27 Development of synergistic and integrated methods and tools for monitoring, management and forecasting of environmental  
28 parameters and pressures".

## 29 **References**

30 Barredo, J. I.: Major flood disasters in Europe: 1950–2005, *Natural Hazards*, 42, 125-148, doi: 10.1007/s11069-006-9065-2,  
31 2007.

32 Barredo, J. I.: Normalised flood losses in Europe: 1970–2006, *Nat. Hazards Earth Syst. Sci.*, 9, 97-104, doi: 10.5194/nhess-  
33 9-97-2009, 2009.

34 Botzen, W. J. W., Aerts, J. C. J. H. and van den Bergh, J. C. J. M.: Willingness of homeowners to mitigate climate risk  
35 through insurance, *Ecological Economics*, 68, 2265-2277, doi: 10.1016/j.ecolecon.2009.02.019, 2009.

36 Bradford, R. A., O'Sullivan, J. J., van der Craats, I. M., Krywkow, J., Rotko, P., Aaltonen, J., Bonaiuto, M., De Dominicis,  
37 S., Waylen, K. and Schelfaut, K.: Risk perception – issues for flood management in Europe, *Nat. Hazards Earth Syst. Sci.*,  
38 12, 2299-2309, doi: 10.5194/nhess-12-2299-2012, 2012.

39 Brilly, M. and Polic, M.: Public perception of flood risks, flood forecasting and mitigation, *Nat. Hazards Earth Syst. Sci.*, 5,  
40 345-355. doi: 10.5194/nhess-5-345-2005, 2005.

1 Brown, V. J.: Risk Perception: It's personal, *Environmental Health Perspectives*, 122, A276-A279, doi: 10.1289/ehp.122-  
2 A276, 2014.

3 Bubeck, P., Botzen, W. J. W. and Aerts, J. C. J. H.: A review of risk perceptions and other factors that influence flood  
4 mitigation behavior, *Risk Analysis*, 32, 1481-1495, doi: 10.1111/j.1539-6924.2011.01783.x, 2012.

5 Burningham, K., Fielding, J. and Thrush, D.: 'It'll never happen to me': understanding public awareness of local flood risk,  
6 *Disasters*, 32, 216-238, doi: 10.1111/j.1467-7717.2007.01036.x, 2008.

7 Cardona, O. D., van Aalst, M. K., Birkmann, J., Fordham, M., McGregor, G., Perez, R., Pulwarty, R. S., Schipper, E. L. F.  
8 and Sinh, B. T. (Eds.). Determinants of risk: exposure and vulnerability. In: *Managing the risks of extreme events and*  
9 *disasters to advance climate change adaptation. A Special Report of Working Groups I and II of the Intergovernmental Panel*  
10 *on Climate Change (IPCC)*. pp. 65-108. Cambridge, UK, and New York, NY, USA: Cambridge University Press, 2012.

11 Diakakis, M., Priskos, G. and Skordoulis, M.: Public perception of flood risk in flash flood prone areas of Eastern  
12 Mediterranean: The case of Attica Region in Greece, *International Journal of Disaster Risk Reduction*, 28, 404-413,  
13 doi.org/10.1016/j.ijdrr.2018.03.018, 2018.

14 Ejeta, L. T., Ardalan, A. and Paton, D.: Application of Behavioral Theories to Disaster and Emergency Health Preparedness:  
15 A Systematic Review. *PLOS Currents Disasters*, 7, Edition 1  
16 <http://doi.org/10.1371/currents.dis.31a8995ced321301466db400f1357829>, 2015.

17 Fatti, C. E. and Patel, Z. Perceptions and responses to urban flood risk: Implications for climate governance in the South,  
18 *Applied Geography*, 36, 13-22, doi: 10.1016/j.apgeog.2012.06.011, 2013.

19 Glatron, S. and Beck, E.: Evaluation of socio-spatial vulnerability of citydwellers and analysis of risk perception: industrial  
20 and seismic risks in Mulhouse, *Nat. Hazards Earth Syst. Sci.*, 8, 1029-1040, doi: 10.5194/nhess-8-1029-2008, 2008.

21 Grothmann, T., and Reusswig, F.: People at risk of flooding: why some residents take precautionary action while others do  
22 not, *Natural Hazards*, 38, 101-120, 2006.

23 Gujarati, D., N.: *Basic econometrics* (4th ed.). USA, New York, NY: The McGraw-Hill Companies, 2004

24 Haer, T., Botzen, W. J. W. and Aerts, J. C. J. H.: The effectiveness of flood risk communication strategies and the influence  
25 of social networks—Insights from an agent-based model, *Environmental Science and Policy*, 60, 44-52, doi:  
26 10.1016/j.envsci.2016.03.006, 2016.

27 Hayes, A. F.: *Introduction to mediation, moderation, and conditional process analysis: A regression-based approach*, New  
28 York, NY: Guilford Publications, 2013.

29 Hu, L.-t. and Bentler, P. M.: Cutoff criteria for fit indexes in covariance structure analysis: Conventional criteria versus new  
30 alternatives, *Structural Equation Modeling: A Multidisciplinary Journal*, 6, 1-55, doi: 10.1080/10705519909540118, 1999.

31 Iacobucci, D.: Structural equations modeling: Fit Indices, sample size, and advanced topics, *Journal of Consumer*  
32 *Psychology*, 20, 90-98, doi: 10.1016/j.jcps.2009.09.003, 2010.

33 Kellens, W., Terpstra, T. and De Maeyer, P.: Perception and communication of flood risks: A systematic review of empirical  
34 research, *Risk Analysis*, 33, 24-49, doi: 10.1111/j.1539-6924.2012.01844.x, 2013.

35 Kellens, W., Zaalberg, R., Neutens, T., Vanneuville, W. and De Maeyer, P.: An analysis of the public perception of flood  
36 risk on the Belgian coast, *Risk Analysis*, 31, 1055-1068, doi: 10.1111/j.1539-6924.2010.01571.x, 2011.

37 Keller, C., Siegrist, M. and Gutscher, H.: The role of the affect and availability heuristics in risk communication, *Risk*  
38 *Analysis*, 26, 631-639, doi: 10.1111/j.1539-6924.2006.00773.x, 2006.

39 Kreibich, H. and Thielen, A. H.: Coping with floods in the city of Dresden, Germany, *Natural Hazards*, 51, 423, doi:  
40 10.1007/s11069-007-9200-8, 2008.

41 Kron, W.: Flood risk = hazard • values • vulnerability, *Water International*, 30, 58-68, doi: 10.1080/02508060508691837,  
42 2005.

1 Lagouvardos, K., Kotroni, V., Bezes, A., Koletsis, I., Kopania, T., Lykoudis, S., Mazarakis, N., Papagiannaki, K. and  
2 Vougioukas, S.: The automatic weather stations NOANN network of the National Observatory of Athens: operation and  
3 database, *Geoscience Data Journal*, 4, 4-16, doi: 10.1002/gdj3.44, 2017.

4 Lagouvardos, K., Kotroni, V., Koussis, A., Feidas, H., Buzzi, A. and Malguzzi, P.: The meteorological model BOLAM at  
5 the National Observatory of Athens: Assessment of two-year operational use, *Journal of Applied Meteorology*, 42, 1667-  
6 1678. doi: 10.1175/1520-0450(2003)042<1667:tmmbat>2.0.co;2, 2003.

7 Lave, T. R. and Lave, L. B.: Public perception of the risks of floods: Implications for communication, *Risk Analysis*, 11,  
8 255-267, doi: 10.1111/j.1539-6924.1991.tb00602.x, 1991.

9 Marsh, H. W., Hau, K.-T. and Wen, Z.: In search of golden rules: Comment on hypothesis-testing approaches to setting  
10 cutoff values for fit indexes and dangers in overgeneralizing Hu and Bentler's (1999) findings, *Structural Equation*  
11 *Modeling: A Multidisciplinary Journal*, 11, 320-341, doi: 10.1207/s15328007sem1103\_2, 2004.

12 McDonald, J. H., *Handbook of Biological Statistics* (3rd ed.), Sparky House Publishing. Baltimore, Maryland. Retrieved  
13 from <http://www.biostathandbook.com/>, 2014.

14 Miceli, R., Sotgiu, I. and Settanni, M.: Disaster preparedness and perception of flood risk: A study in an alpine valley in  
15 Italy, *Journal of Environmental Psychology*, 28, 164-173, doi: 10.1016/j.jenvp.2007.10.006, 2008.

16 NOA, [High-impact weather events (HIWE) interactive database], Weather events with socio-economic impact in Greece,  
17 since 2001, National Observatory of Athens, Institute for Environmental Research and Sustainable Development, Weather  
18 forecast group. Available from [http://www.meteo.gr/weather\\_cases.cfm](http://www.meteo.gr/weather_cases.cfm), 2018

19 Nye, M., Tapsell, S. and Twigger-Ross, C.: New social directions in UK flood risk management: moving towards flood risk  
20 citizenship?, *Journal of Flood Risk Management*, 4, 288-297, doi:10.1111/j.1753-318X.2011.01114.x, 2011.

21 O'Neill, E., Brereton, F., Shahumyan, H. and Clinch, J. P.: The impact of perceived flood exposure on flood-risk perception:  
22 The role of distance, *Risk Analysis*, 36, 2158-2186, doi: 10.1111/risa.12597, 2016.

23 O'Sullivan, J. J., Bradford, R. A., Bonaiuto, M., De Dominicis, S., Rotko, P., Aaltonen, J., J., Waylen, K. and Langan, S. J.:  
24 Enhancing flood resilience through improved risk communications, *Natural Hazards and Earth System Sciences*, 12, 2271-  
25 2282, doi: 10.5194/nhess-12-2271-2012, 2012.

26 Papagiannaki, K., Kotroni, V., Lagouvardos, K., Ruin, I. and Bezes, A.: Urban area response to flash flood-triggering  
27 rainfall, featuring human behavioral factors: The case of 22 October 2015 in Attica, Greece, *Weather, Climate, and Society*,  
28 9, 621-638, doi: 10.1175/wcas-d-16-0068.1, 2017.

29 Papagiannaki, K., Lagouvardos, K., and Kotroni, V.: A database of high-impact weather events in Greece: a descriptive  
30 impact analysis for the period 2001–2011, *Nat. Hazards Earth Syst. Sci.*, 13, 727-736, doi: 10.5194/nhess-13-727-2013,  
31 2013.

32 Podsakoff, P. M., MacKenzie, S. B., Lee, J. Y. and Podsakoff, N. P.: Common method biases in behavioral research: A  
33 critical review of the literature and recommended remedies, *Journal of Applied Psychology*, 88, 879-903, doi: 10.1037/0021-  
34 9010.88.5.879, 2003.

35 Poussin, J. K., Botzen, W. J. W. and Aerts, J. C. J. H.: Factors of influence on flood damage mitigation behaviour by  
36 households, *Environmental Science and Policy*, 40, 69-77, doi: 10.1016/j.envsci.2014.01.013, 2014.

37 Raaijmakers, R., Krywkow, J. and van der Veen, A.: Flood risk perceptions and spatial multi-criteria analysis: an exploratory  
38 research for hazard mitigation, *Natural Hazards*, 46, 307-322, doi: 10.1007/s11069-007-9189-z, 2008.

39 Rambonilaza, T., Joalland, O. and Brahic, E.: Landowner's perception of flood risk and preventive actions in estuarine  
40 environment: An empirical investigation, *Journal of Environmental Management*, 180, 272-279, doi:  
41 <https://doi.org/10.1016/j.jenvman.2016.05.037>, 2016.

42 Rogers, R. W.: A protection motivation theory of fear appeals and attitude change, *The Journal of Psychology*, 91, 93-114,  
43 doi: 10.1080/00223980.1975.9915803, 1975.

1 Rogers, R. W.: Cognitive and physiological processes in fear appeals and attitude change: A revised theory of protection  
2 motivation, In Cacioppo, J., Petty, R. (Eds.), *Social psychophysiology*, New York. NY: Guilford Press, 1983

3 Ruin, I., Gaillard, J.-C. and Lutoff, C.: How to get there? Assessing motorists' flash flood risk perception on daily itineraries,  
4 *Environmental Hazards*, 7, 235-244, doi: 10.1016/j.envhaz.2007.07.005, 2007.

5 Schifter D.E. and Ajzen I.: Intention, perceived control, and weight loss: An application of the theory of planned behavior,  
6 *Journal of Personality and Social Psychology*, 49, 843-851, 1985.

7 Scolobig, A., De Marchi, B. and Borga, M.: The missing link between flood risk awareness and preparedness: findings from  
8 case studies in an Alpine Region, *Natural Hazards*, 63, 499-520, doi: 10.1007/s11069-012-0161-1, 2012.

9 Shipley, B.: Path analysis and maximum likelihood, In *Cause and Correlation in Biology: A User's Guide to Path Analysis,*  
10 *Structural Equations and Causal Inference with R* (pp. 87-125), Cambridge: Cambridge University Press.  
11 doi:10.1017/CBO9781139979573.006, 2016.

12 Siegrist, M. and Gutscher, H.: Flooding risks: A comparison of lay people's perceptions and expert's assessments in  
13 Switzerland, *Risk Analysis*, 26, 971-979, doi: 10.1111/j.1539-6924.2006.00792.x, 2006.

14 Siegrist, M. and Gutscher, H.: Natural hazards and motivation for mitigation behavior: People cannot predict the affect  
15 evoked by a severe flood, *Risk Analysis*, 28, 771-778, doi: 10.1111/j.1539-6924.2008.01049.x, 2008.

16 Sjöberg, L., Moen, B.-E. and Rundmo, T.: Explaining risk perception. An evaluation of the psychometric paradigm in risk  
17 perception. Trondheim, Norway: Norwegian University of Science and Technology, Department of Psychology. C Rotunde  
18 Publikasjoner. Available from [http://www.svt.ntnu.no/psy/Torbjorn.Rundmo/Psychometric\\_paradigm.pdf](http://www.svt.ntnu.no/psy/Torbjorn.Rundmo/Psychometric_paradigm.pdf), 2004.

19 Tavakol, M. and Dennick, R.: Making sense of Cronbach's alpha, *International Journal of Medical Education*, 2, 53-55, doi:  
20 10.5116/ijme.4dfb.8dfd, 2011.

21 Terpstra, T.: Emotions, trust, and perceived risk: affective and cognitive routes to flood preparedness behavior, *Risk*  
22 *Analysis*, 31, 1658-1675, doi: 10.1111/j.1539-6924.2011.01616.x, 2011.

23 Terpstra, T. and Lindell, M. K.: Citizens' perceptions of flood hazard adjustments, *Environment and Behavior*, 45, 993-  
24 1018, doi: 10.1177/0013916512452427, 2013.

25 Terti, G., Ruin, I., Anquetin, S. and Gourley, J.: Dynamic vulnerability factors for impact-based flash flood prediction,  
26 *Natural Hazards*, 79, 1481-1497, doi: 10.1007/s11069-015-1910-8, 2015.

27 Treby, E. J., Clark, M. J. and Priest, S. J.: Confronting flood risk: Implications for insurance and risk transfer, *Journal of*  
28 *Environmental Management*, 81(4), 351-359, doi: <https://doi.org/10.1016/j.jenvman.2005.11.010>, 2006.

29 UN/ISDR. [United Nations Terminology]. Terminology on Disaster Risk Reduction. Available from  
30 <https://www.unisdr.org/we/inform/terminology>, 2009.

31 Wachinger, G., Renn, O., Begg, C. and Kuhlicke, C.: The risk perception paradox—Implications for governance and  
32 communication of natural hazards: *Risk Analysis*, 33, 1049-1065, doi: 10.1111/j.1539-6924.2012.01942.x, 2013.

33 Weinstein, N. D., Rothman, A. J. and Nicolich, M.: Use of correlational data to examine the effects of risk perceptions on  
34 precautionary behavior, *Psychology and Health*, 13, 479-501, 1998.

35 Whitmarsh, L.: Are flood victims more concerned about climate change than other people? The role of direct experience in  
36 risk perception and behavioural response, *Journal of Risk Research*, 11, 351-374, doi: 10.1080/13669870701552235, 2008.

37 Zaleskiewicz, T., Piskorz, Z. and Borkowska, A.: Fear or money? Decisions on insuring oneself against flood, *Risk,*  
38 *Decision and Policy*, 7(3), 221-233, doi: 10.1017/s1357530902000662, 2002.

39

Appendix A

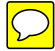

Table A1. Variable description and synthesis

| Variable                     | Items involved                                                                                                                                                                                                                                                                   | Description                                                            |
|------------------------------|----------------------------------------------------------------------------------------------------------------------------------------------------------------------------------------------------------------------------------------------------------------------------------|------------------------------------------------------------------------|
| Predictors                   |                                                                                                                                                                                                                                                                                  |                                                                        |
| Awareness-raising            |                                                                                                                                                                                                                                                                                  |                                                                        |
| Experience severity (X1)     | 1 item, to measure the level of the impact suffered by the respondent                                                                                                                                                                                                            | Ordinal: 0 "no flood impact" to 5 "high flood impact"                  |
| Vulnerability awareness (X2) | Ratio of 2 items (X2 <sub>i</sub> ): 'perceived exposure' to 'actual exposure'                                                                                                                                                                                                   | Ordinal: 0.5 "low awareness" to 3 "high awareness"                     |
|                              | X2 <sub>1</sub> 'Perceived exposure': Do you think you are more threatened due to residing in a flood-prone area?                                                                                                                                                                | Ordinal: 1 "no", 2 "maybe", 3 "yes"                                    |
|                              | X2 <sub>2</sub> 'actual exposure': Distance of residence from the nearest water source (river, stream, canal, lake).                                                                                                                                                             | Ordinal: 1 ">1 km", 2 "<1 km"                                          |
| Risk communication (X3)      | Sum of 6 dichotomous items (X3 <sub>i</sub> ) weighted for immediacy in communication:                                                                                                                                                                                           | Ordinal: 0 "no risk communication" to 8 "very high risk communication" |
|                              | $X3 = 0 * [X3_1, \text{no communication}] + 1 * [X3_2, \text{media} + X3_3, \text{leaflets}] + 2 * [X3_4, \text{panels} + X3_5, \text{risk maps} + X3_6, \text{seminars}]$                                                                                                       |                                                                        |
| Confidence attitudes         |                                                                                                                                                                                                                                                                                  |                                                                        |
| Trust in authorities (X4)    | Average of 2 items (X4 <sub>i</sub> ). (The items follow a Likert scale, 0 - 4):                                                                                                                                                                                                 | Ordinal: 0 "no trust" to 4 "high trust"                                |
|                              | X4 <sub>1</sub> . How adequate do you think the local authorities' measures taken to strengthen your area against future heavy rainfall/floods are?<br><br>X4 <sub>2</sub> (reversed). How much do you think inefficient state measures have contributed to floods in your area? |                                                                        |
| Self-confidence (X5)         | Average of 2 items (X5 <sub>i</sub> ). (The items follow a Likert scale, 0 - 4):                                                                                                                                                                                                 | Ordinal: 0 "lack of knowledge" to 4 "substantial knowledge"            |
|                              | X5 <sub>1</sub> . How well do you know the flood risks in your area?                                                                                                                                                                                                             |                                                                        |



| Variable                  | Items involved                                                                                                                                                                                                                                                                                                                                                                                                                                                                                                                                                                                                                                                                                                                                      | Description                                                                                                                                   |
|---------------------------|-----------------------------------------------------------------------------------------------------------------------------------------------------------------------------------------------------------------------------------------------------------------------------------------------------------------------------------------------------------------------------------------------------------------------------------------------------------------------------------------------------------------------------------------------------------------------------------------------------------------------------------------------------------------------------------------------------------------------------------------------------|-----------------------------------------------------------------------------------------------------------------------------------------------|
|                           | X5 <sub>2</sub> . How well do you know the protective measures and strategies implemented by local authorities in your area?                                                                                                                                                                                                                                                                                                                                                                                                                                                                                                                                                                                                                        |                                                                                                                                               |
| Mediators                 |                                                                                                                                                                                                                                                                                                                                                                                                                                                                                                                                                                                                                                                                                                                                                     |                                                                                                                                               |
| Risk perception (M1)      |  <p> <math>M1 = \frac{\sum i(\text{Prob}(i) * \text{Severity}(i))}{\sum i}</math>, where <math>i=5</math> items evaluated by the respondent: a) for impact occurrence probability, <math>\text{Prob}(i)</math>, and b) for the consequent severity, <math>\text{Severity}(i)</math>. (The items follow a Likert scale, 0 - 4): </p> <p> <math>i=1</math>. Power/water cut-offs<br/> <math>i=2</math>. Transportation problems<br/> <math>i=3</math>. Serious damage to properties (e.g., vehicle, outside space/surface of residence)<br/> <math>i=4</math>. Residence partly/completely destroyed<br/> <math>i=5</math>. Injuries/loss of family and friends </p> |  <p>Continuous: <b>Level of risk perception (0-16)</b></p> |
| Worry (M2)                |  <p>4 items, to measure the level of worry for a future flood event.</p>                                                                                                                                                                                                                                                                                                                                                                                                                                                                                                                                                                                           | Ordinal: 0 “not at all worried” to 4 “extremely worried”                                                                                      |
| Outcomes                  |                                                                                                                                                                                                                                                                                                                                                                                                                                                                                                                                                                                                                                                                                                                                                     |                                                                                                                                               |
| Current preparedness (Y1) | <p>Sum of 8 dichotomous items (<math>Y1_i</math>), weighted for their significance in terms of required time and cost:</p> <p>0*[2 items for no adaptation]:</p> <p><math>Y1_1</math>: none of the measures was adopted; the state has implemented appropriate protective measures</p> <p><math>Y1_2</math>: it was not necessary</p> <p>1*[2 items for basic preparedness]: <math>Y1_3</math>: obtained information for risks and protective measures</p>                                                                                                                                                                                                                                                                                          | Continuous: Level of current preparedness (0-12)                                                                                              |

| Variable                    | Items involved                                                                                                                                                                                                                                                                                                                                                                             | Description                                                                                 |
|-----------------------------|--------------------------------------------------------------------------------------------------------------------------------------------------------------------------------------------------------------------------------------------------------------------------------------------------------------------------------------------------------------------------------------------|---------------------------------------------------------------------------------------------|
|                             | <p>Y1<sub>4</sub>: family plan for emergency</p> <p>2*[2 items for flood avoidance measures]:</p> <p>Y1<sub>5</sub>: storm drains and spouts cleaned</p> <p>Y1<sub>6</sub>: power pump, generator or sandbags stored</p> <p>3*[2 items for advanced measures]: Y1<sub>7</sub>: private insurance for natural hazards</p> <p>Y1<sub>8</sub>: construction or other changes in residence</p> |                                                                                             |
| Preparedness intention (Y2) | 1 item, to measure the intention to invest in precautionary measures                                                                                                                                                                                                                                                                                                                       | Ordinal: 0 "no intention" to 4 "high intention"                                             |
| Control variables           |                                                                                                                                                                                                                                                                                                                                                                                            |                                                                                             |
| Ownership (C1)              |                                                                                                                                                                                                                                                                                                                                                                                            | Dummy: 1=ownership                                                                          |
| Gender (C2)                 |                                                                                                                                                                                                                                                                                                                                                                                            | Categorical: 1 "female", 2 "male"                                                           |
| Family size (C3)            |                                                                                                                                                                                                                                                                                                                                                                                            | Ordinal: 1 "1 member", 2 "2 members", 3 "3 members", 4 "4 members", 5 "more than 4 members" |
| Employment (C4)             |                                                                                                                                                                                                                                                                                                                                                                                            | Ordinal: 1 "unemployed", 2 "student", 3 "homemaker", 4 "retired", 5 "employed"              |
| Urbanization (C5)           | 1 item, to specify the settlement's degree of urbanization                                                                                                                                                                                                                                                                                                                                 | Ordinal: 1 "cottage", 2 "village", 3 "small town", 4 "city"                                 |
| Age (C6)                    |                                                                                                                                                                                                                                                                                                                                                                                            | Continuous                                                                                  |

Table 1. Demographic characteristics of the survey sample

| Demographic characteristics | Percentage (rounded off values) |
|-----------------------------|---------------------------------|
| <b>Gender</b>               |                                 |
| Female                      | 32                              |
| Male                        | 68                              |
| <b>Age</b>                  |                                 |
| 15 - 30                     | 20                              |
| 31 - 60                     | 74                              |
| > 60                        | 6                               |
| <b>Employment</b>           |                                 |
| Employed                    | 72                              |
| Retired                     | 10                              |
| Homemaker                   | 1                               |
| <b>Student</b>              | 4                               |
| <b>Unemployed</b>           | 14                              |
| <b>Family size</b>          |                                 |
| 1 member                    | 8                               |
| 2 members                   | 18                              |
| 3 members                   | 25                              |
| 4 members                   | 38                              |
| > 4 members                 | 11                              |
| <b>Ownership</b>            |                                 |
| Home ownership              | 79                              |
| Rent                        | 21                              |

Table 2. Descriptive statistics and correlations (Spearman's rank coefficient (rho))

| Variable                             | Y1       | Y2       | M1       | M2       | X1       | X2       | X3       | X4      | X5      | C1       | C2     | C3      | C4     | C5   | C6   |
|--------------------------------------|----------|----------|----------|----------|----------|----------|----------|---------|---------|----------|--------|---------|--------|------|------|
| Y1                                   |          |          |          |          |          |          |          |         |         |          |        |         |        |      |      |
| Y2                                   | 0.36***  |          |          |          |          |          |          |         |         |          |        |         |        |      |      |
| M1                                   | 0.07**   | 0.24***  |          |          |          |          |          |         |         |          |        |         |        |      |      |
| M2                                   | 0.16***  | 0.34***  | 0.51***  |          |          |          |          |         |         |          |        |         |        |      |      |
| X1                                   | 0.21***  | 0.08***  | 0.08***  | 0.22***  |          |          |          |         |         |          |        |         |        |      |      |
| X2                                   | +        | +        | 0.17***  | 0.17***  | 0.07**   |          |          |         |         |          |        |         |        |      |      |
| X3                                   | 0.09***  | 0.08**   | +        | +        | 0.05*    | +        |          |         |         |          |        |         |        |      |      |
| X4                                   | -0.12*** | +        | -0.25*** | -0.17*** | -0.07**  | -0.13*** | 0.23***  |         |         |          |        |         |        |      |      |
| X5                                   | 0.21***  | 0.14***  | -0.07**  | +        | +        | -0.06*   | 0.32***  | 0.19*** |         |          |        |         |        |      |      |
| C1                                   | 0.18***  | 0.10***  | +        | 0.05*    | 0.06**   | +        | -0.05*   | +       | +       |          |        |         |        |      |      |
| C2                                   | 0.06**   | +        | -0.13*** | -0.10*** | +        | -0.05*   | 0.06*    | +       | 0.12*** | +        |        |         |        |      |      |
| C3                                   | 0.09***  | 0.07**   | +        | 0.05*    | +        | +        | +        | +       | +       | 0.18***  | 0.05*  |         |        |      |      |
| C4                                   | 0.05*    | 0.07**   | +        | +        | +        | +        | +        | +       | +       | +        | 0.05*  | +       |        |      |      |
| C5                                   | -0.13*** | -0.09*** | -0.06**  | +        | -0.10*** | 0.06**   | +        | 0.06*   | +       | -0.12*** | -0.05* | -0.07** | +      |      |      |
| C6                                   | 0.18***  | 0.09**   | +        | 0.18***  | 0.11***  | -0.06*   | -0.10*** | +       | 0.06*   | 0.19***  | -0.07* | +       | 0.08** | +    |      |
| max 24 h rain                        |          |          |          |          | 0.21***  |          |          |         |         |          |        |         |        |      |      |
| year of most recent flood experience |          |          |          |          |          |          |          |         |         |          |        |         |        |      |      |
|                                      | +        | +        | +        | 0.18***  | -0.12*   | 0.16**   | +        | -0.10*  | +       |          |        |         |        |      |      |
| Mean                                 | 3.87     | 1.85     | 5.37     | 2.18     | 0.59     | 1.10     | 0.39     | 1.09    | 1.51    | 0.79     | 1.68   | 3.28    | 1.76   | 3.58 | 42.1 |
| Std. Dev.                            | 2.70     | 1.14     | 3.65     | 1.17     | 1.30     | 0.58     | 0.93     | 0.83    | 1.10    | 0.41     | 0.47   | 1.11    | 1.42   | 0.78 | 12.2 |
| Min                                  | 0        | 0        | 0        | 0        | 0        | 0.5      | 0        | 0       | 0       | 0        | 1      | 1       | 1      | 1    | 15   |
| Max                                  | 12       | 4        | 16       | 4        | 5        | 3        | 8        | 4       | 4       | 1        | 2      | 5       | 5      | 4    | 86   |

Y1:current preparedness, Y2:preparedness intention, M1:risk perception, M2:worry, X1:experience severity, X2:vulnerability awareness, X3:risk communication, X4:trust in authorities, X5:self-confidence, C1:ownership, C2:gender, C3:family size, C4:employment, C5:urbanization, C6:age

Note. The sample size ( $n$ ) in the correlations between pairs of variables is 1,810, except for the correlations with 'age' ( $n=1,227$ ), 'year of most recent flood experience' ( $n=368$ ), and 'max 24 h rain' ( $n=281$ ). The 'max 24 h rain' is the maximum 24 h rain accumulated during the flood events reported by the survey respondents. Statistical significance,  $p$  value, is symbolized as:  $+p > .05$  (not significant),  $*p \leq .05$ ,  $**p < .01$ ,  $***p < .001$ .

Table 3 Path analysis results

| Variables                   | SEM parameters | SEM parameters            |
|-----------------------------|----------------|---------------------------|
| Indirect effects            |                |                           |
| Mediated by risk perception |                | Mediated by worry         |
| X1→M1→Y1                    | +              | X1→M2→Y1 0.04(0.01)***    |
| X2→M1→Y1                    | +              | X2→M2→Y1 0.06(0.02)***    |
| X3→M1→Y1                    | +              | X3→M2→Y1 +                |
| X4→M1→Y1                    | +              | X4→M2→Y1 -0.05(0.01)***   |
| X5→M1→Y1                    | +              | X5→M2→Y1 +                |
| X1→M1→Y2                    | 0.01(0.00)**   | X1→M2→Y2 0.05(0.01)***    |
| X2→M1→Y2                    | 0.02(0.01)**   | X2→M2→Y2 0.08(0.01)***    |
| X3→M1→Y2                    | +              | X3→M2→Y2 0.02(0.01)*      |
| X4→M1→Y2                    | -0.03(0.01)*** | X4→M2→Y2 -0.06(0.01)***   |
| X5→M1→Y2                    | +              | X5→M2→Y2 +                |
| Direct effects              |                |                           |
| on current preparedness     |                | on preparedness intention |
| X1→Y1                       | 0.29(0.05)***  | X1→Y2 +                   |
| X2→Y1                       | +              | X2→Y2 +                   |
| X3→Y1                       | 0.18(0.07)**   | X3→Y2 +                   |
| X4→Y1                       | -0.50(0.07)*** | X4→Y2 +                   |
| X5→Y1                       | 0.52(0.06)***  | X5→Y2 0.13(0.02)***       |
| M1→Y1                       | +              | M1→Y2 0.03(0.01)***       |
| M2→Y1                       | 0.22(0.06)***  | M2→Y2 0.27(0.03)***       |
| C1→Y1                       | 0.94(0.15)***  | C1→Y2 0.19(0.06)**        |
| C2→Y1                       | +              | C2→Y2 +                   |
| C3→Y1                       | 0.13(0.05)*    | C3→Y2 0.05(0.02)*         |
| C4→Y1                       | 0.15(0.04)***  | C4→Y2 0.06(0.02)***       |
| C5→Y1                       | -0.28(0.08)*** | C5→Y2 -0.09(0.03)**       |
| Direct effects              |                |                           |
| on risk perception          |                | on worry                  |
| X1→M1                       | 0.27(0.06)***  | X1→M2 0.19(0.02)***       |
| X2→M1                       | 0.74(0.15)***  | X2→M2 0.29(0.05)***       |
| X3→M1                       | +              | X3→M2 0.07(0.03)*         |
| X4→M1                       | -1.00(0.10)*** | X4→M2 -0.21(0.03)***      |

| Variables               | SEM parameters | SEM parameters    |
|-------------------------|----------------|-------------------|
| X5→M1                   | +              | X5→M2<br>+        |
| Covariance Y1-Y2        | 0.29(0.02)***  |                   |
| <i>Observations (n)</i> | 1,810          |                   |
| Fit statistics          |                |                   |
| <i>Chi-square</i>       | 53.96          | <i>CFI</i> 0.97   |
| <i>d.f.</i>             | 10             | <i>SRMR</i> 0.02  |
| <i>p</i>                | 0.00           | <i>RMSEA</i> 0.05 |
| <i>cd</i>               | 0.28           |                   |

*Symbols:* Y1=current preparedness, Y2=preparedness intention, M1=risk perception, M2=worry, X1=experience severity, X2=vulnerability awareness, X3=risk communication, X4=trust in authorities, X5=self-confidence, C1=ownership, C2=gender, C3=family size, C4=employment, C5=urbanization

*Note.* Statistical significance, *p* value, is symbolized as: +*p* > .05 (not significant), \**p* ≤ .05, \*\**p* < .01, \*\*\**p* < .001. The parameter estimates are standardized coefficients with standard errors in parentheses.



## Figure Titles

Figure 1. Model of individual precautionary behavior against flood risk. Awareness-raising and confidence-related variables mediated by risk perception and worry.

Figure 2. (a) Distributions of the HIWE flood record (NOA, 2018; Papagiannaki et al., 2013) and the survey flood reports by prefecture (2000-2016). (b) Annual distribution of the survey flood reports (1955-2016).

Figure 3. Effects (path analysis, stand. coefficients) of the model's predictor variables on a) the current preparedness and b) the preparedness intention. Each total effect is further analyzed into direct effect and indirect effects mediated by risk perception and worry.

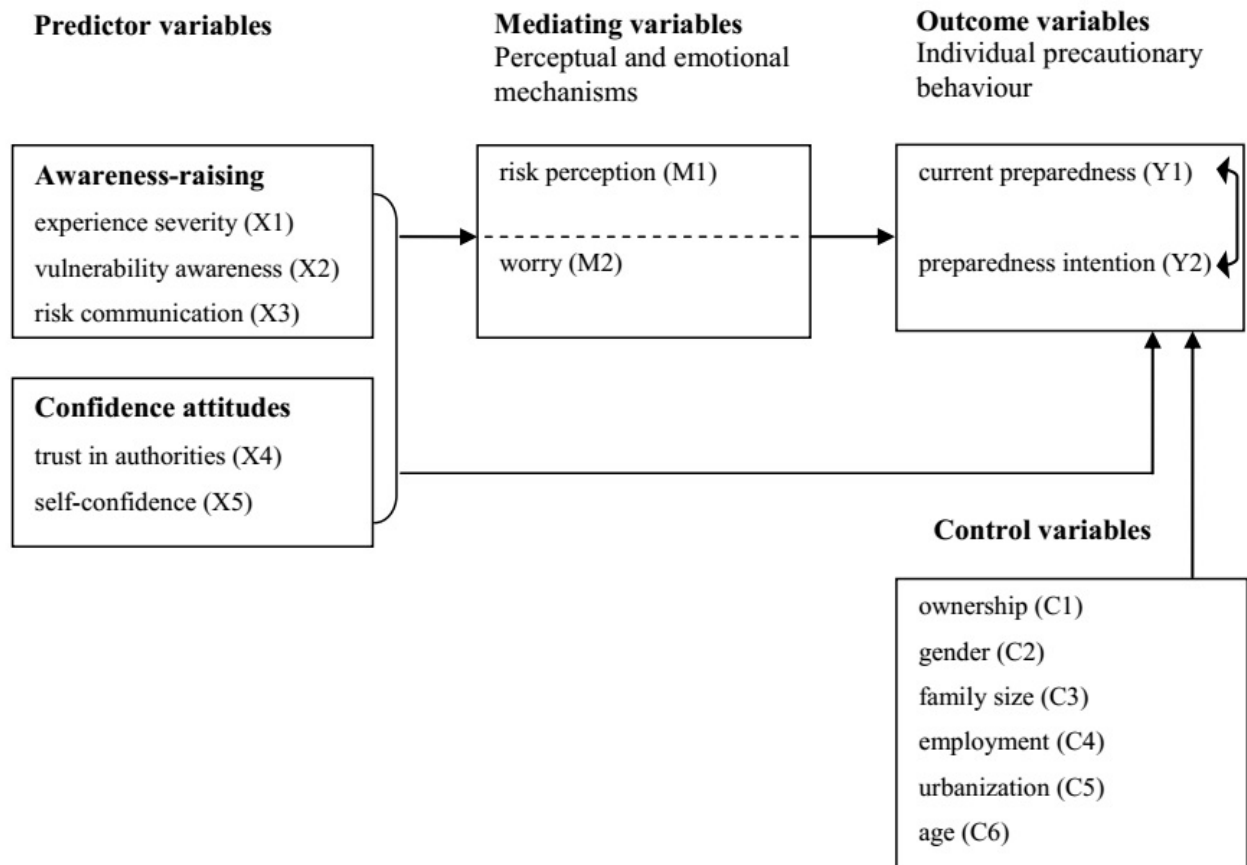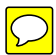

Figure 1. Model of individual precautionary behavior against flood risk. Awareness-raising and confidence-related variables mediated by risk perception and worry.

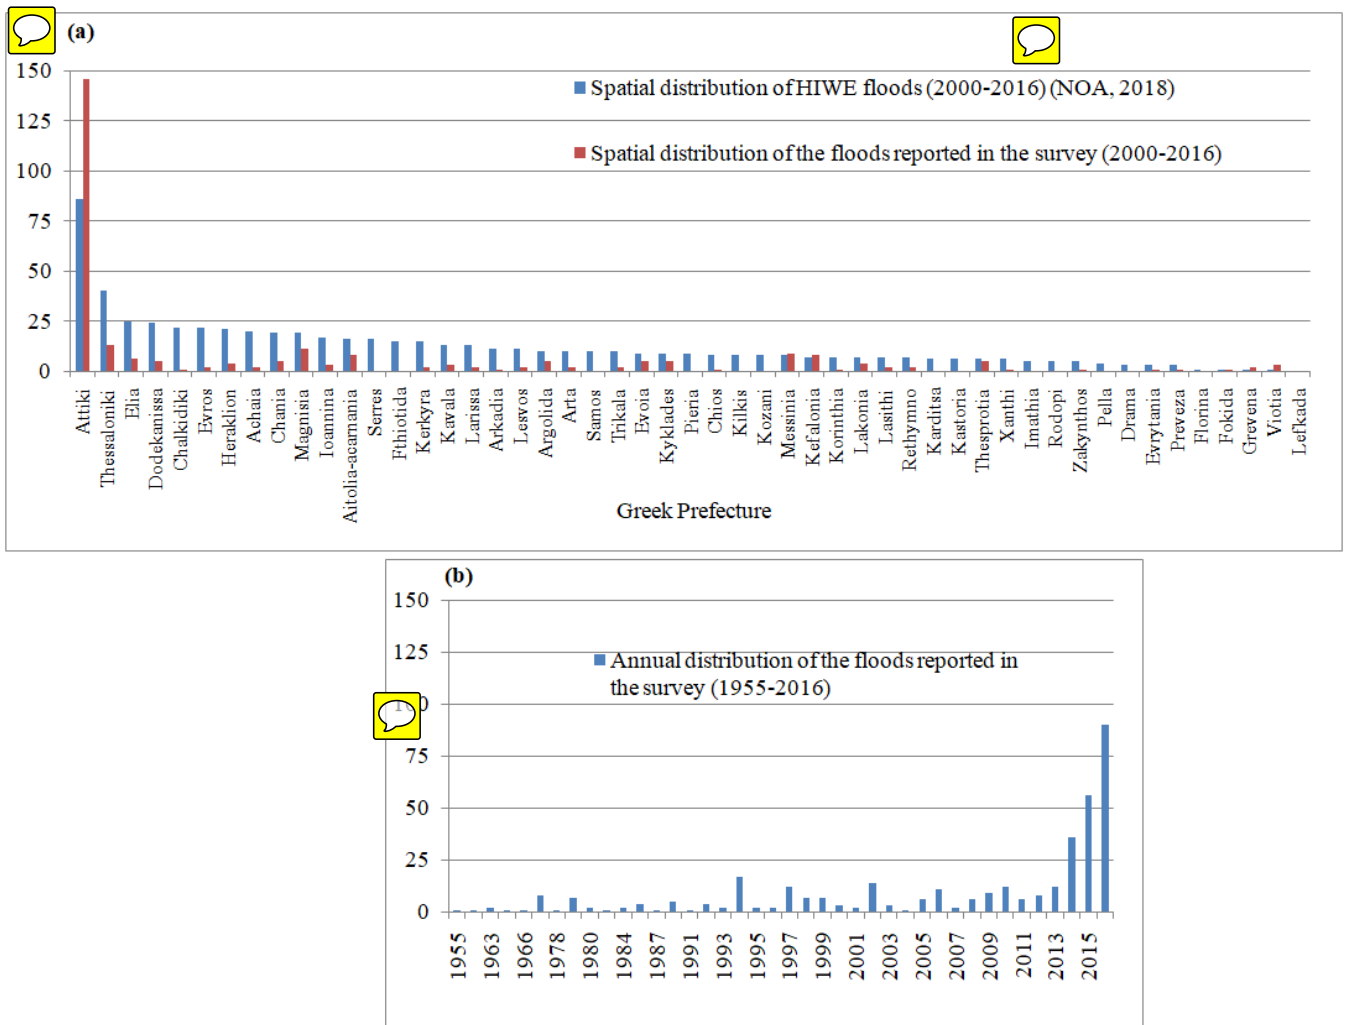

Figure 2. (a) Distributions of the HIWE flood record (NOA, 2018; Papagiannaki et al., 2013) and the survey flood reports by prefecture (2000-2016). (b) Annual distribution of the survey flood reports (1955-2016).

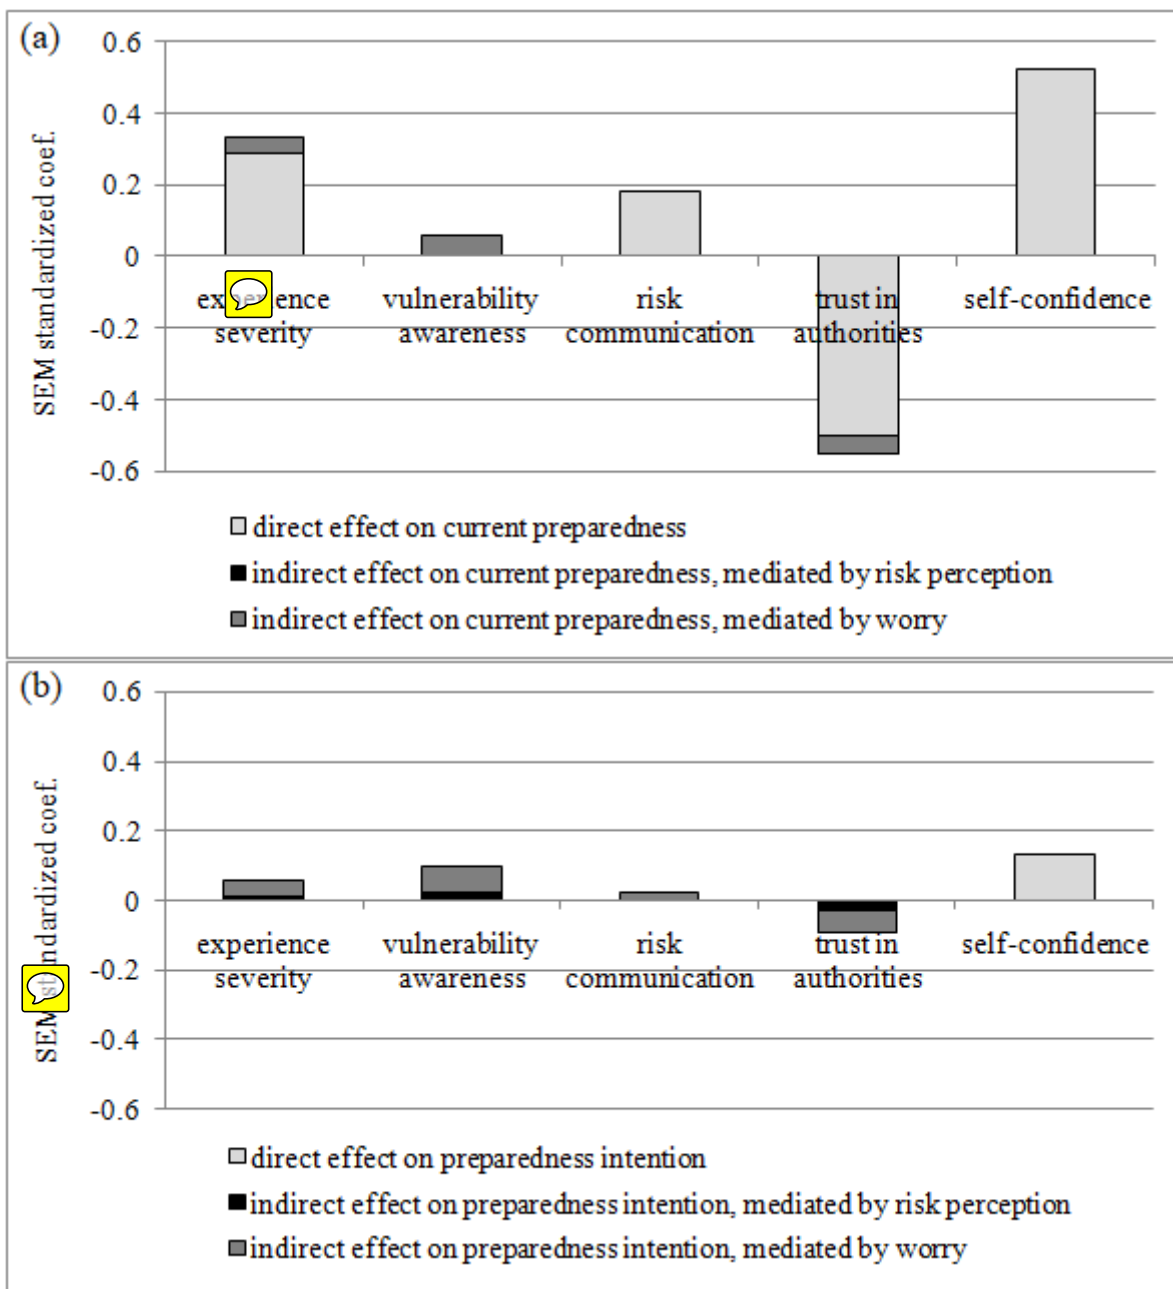

Figure  Effects (path analysis, stand. coefficients) of the model's predictor variables on a) the current preparedness and b) the preparedness intention. Each total effect is further analyzed into direct effect and indirect effects mediated by risk perception and worry.
